# Supplementary material for: Prognostic Impact of Low Skeletal Muscle Mass on Major Adverse Cardiovascular Events in Coronary Artery Disease: A Propensity Score-Matched Analysis of a Single Center All-Comer Cohort
Source: PubMed Central journal article supplement (PMC6571815; doi:10.3390/jcm8050712), 2019-05-19
Supplement: jcm-08-00712-s001.pdf [file jcm-08-00712-s001.pdf]

# **Prognostic impact of low skeletal muscle mass on major adverse cardiovascular events in coronary artery disease: a propensity score-matched analysis of single center all-comer cohort**

## **SUPPLEMENTAL FIGURE LEGENDS**

### **Figure S1. Flow chart of patient enrollment.**

CT = computed tomography; L1 = first lumbar vertebra; PCI = percutaneous coronary intervention; PSM = propensity-score matched; SMA = skeletal muscle area; SMI = skeletal muscle index

**Figure S2. Receiver operating characteristic curves generated for 3-year clinical outcomes based on L1 SMI.** Results for the overall study population (A, D) and sex-specific results for the males (B, E) and the females (C, F) are displayed.

AUC = area under the curve; CI = confidence interval; L1 = first lumbar vertebra; MACE = major adverse cardiovascular event; SMI = skeletal muscle index

### **Figure S3. Correlation between BMI and measured L1 SMI.**

BMI = body mass index; L1 = first lumbar vertebra; SMI = skeletal muscle index

**Figure S4. Intra- and Interobserver variability of L1 SMI measurement.** Intraobserver agreement of observer 1 (A, B) and observer 2 (C, D) with interobserver agreement between observer 1 and observer 2 (E, F) are displayed.

L1 = first lumbar vertebra; ICC = intra-class correlation coefficient; SMI = skeletal muscle index

**Figure S1. Flow chart of patient enrollment.**

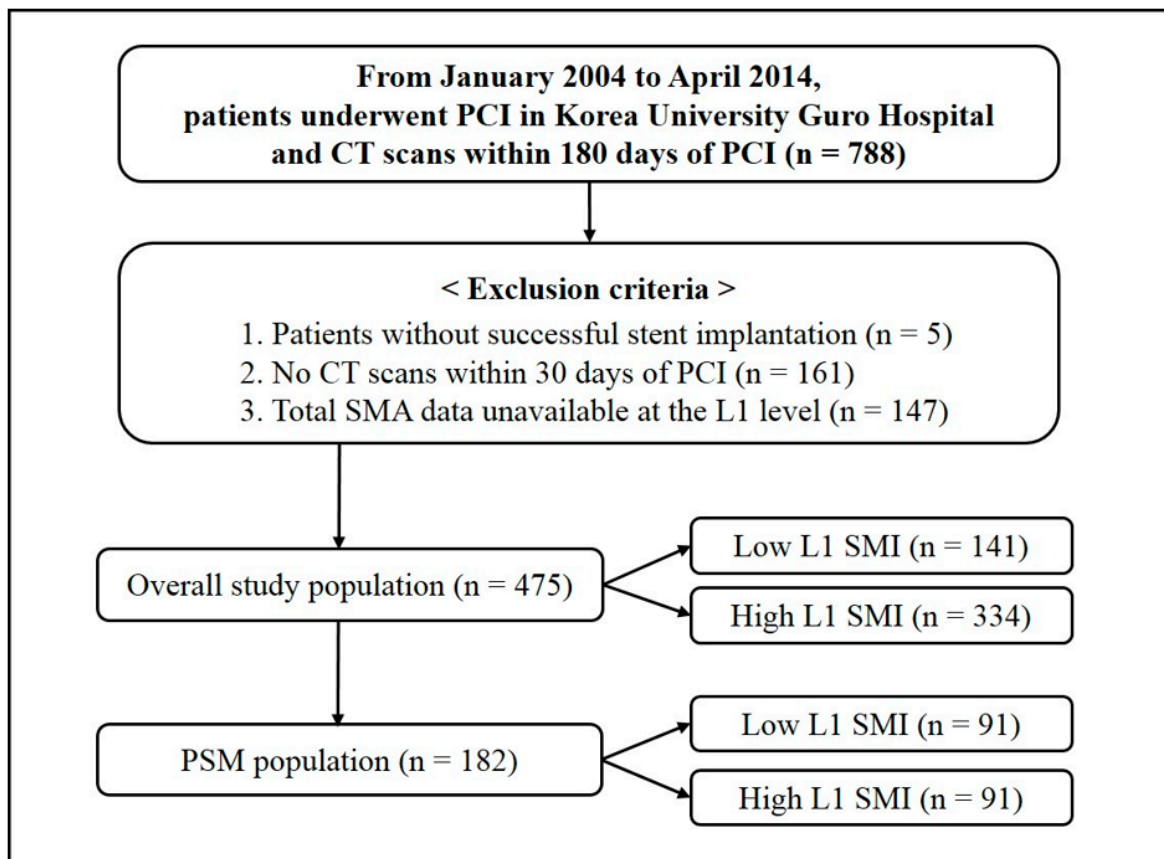

Figure S2. Receiver operating characteristic curves generated for 3-year clinical outcomes based on L1 SMI.

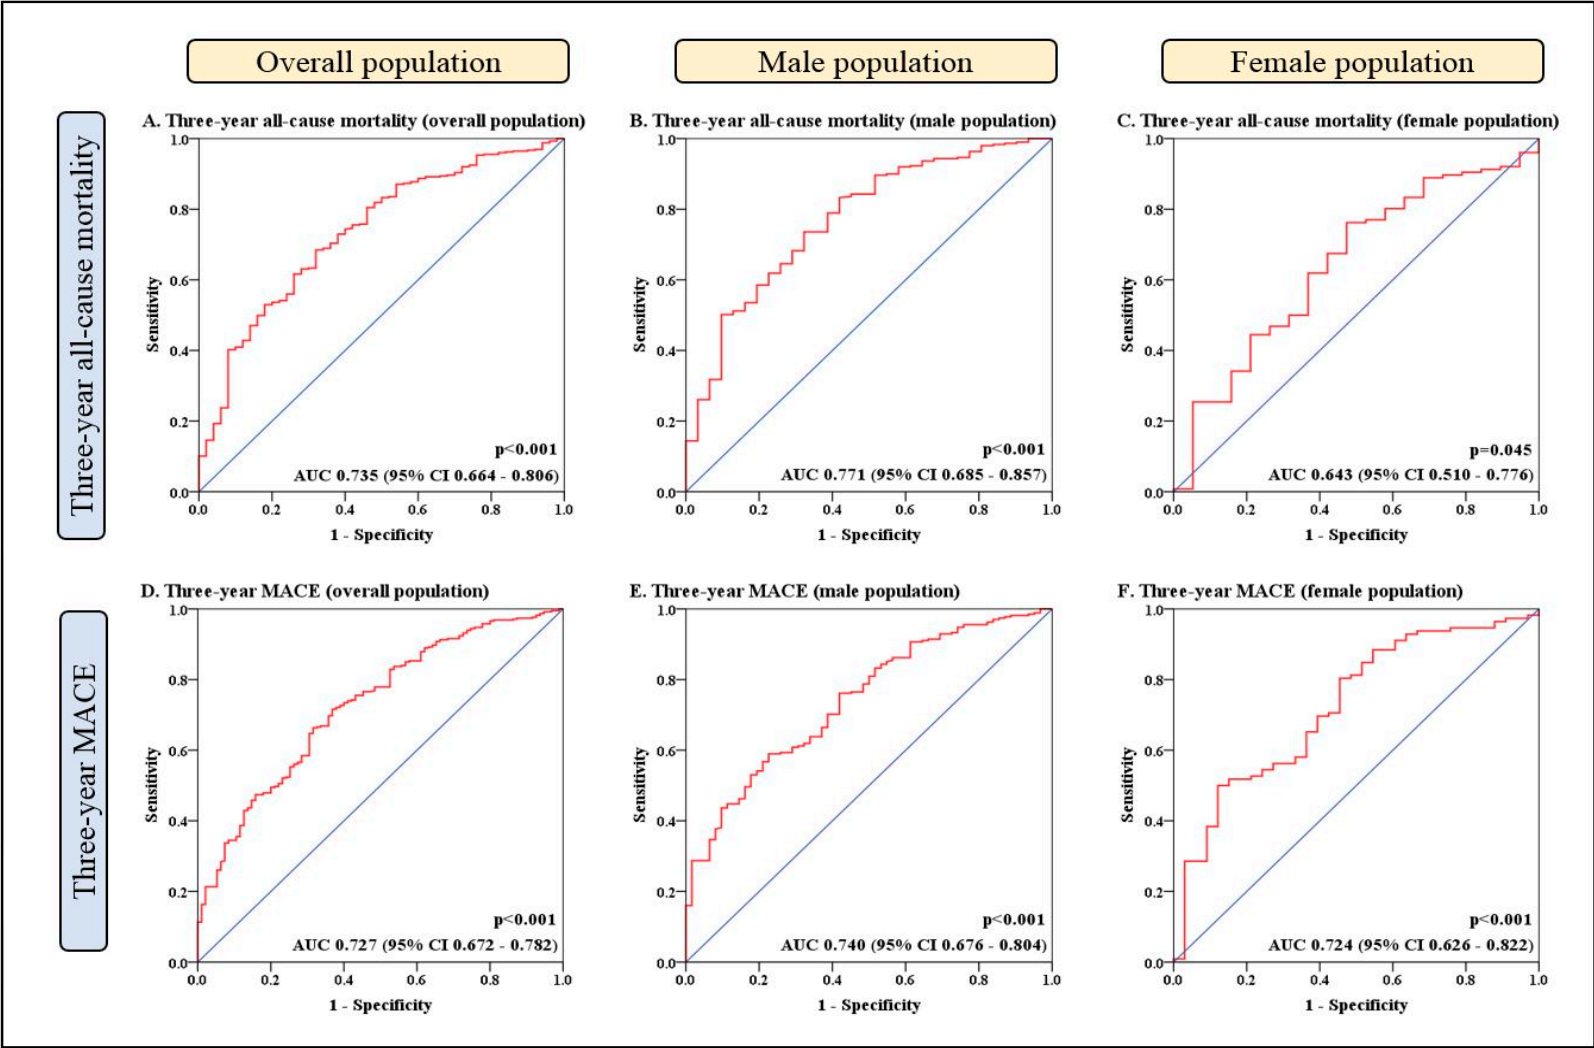

**Figure S3. Correlation between BMI and measured L1 SMI.**

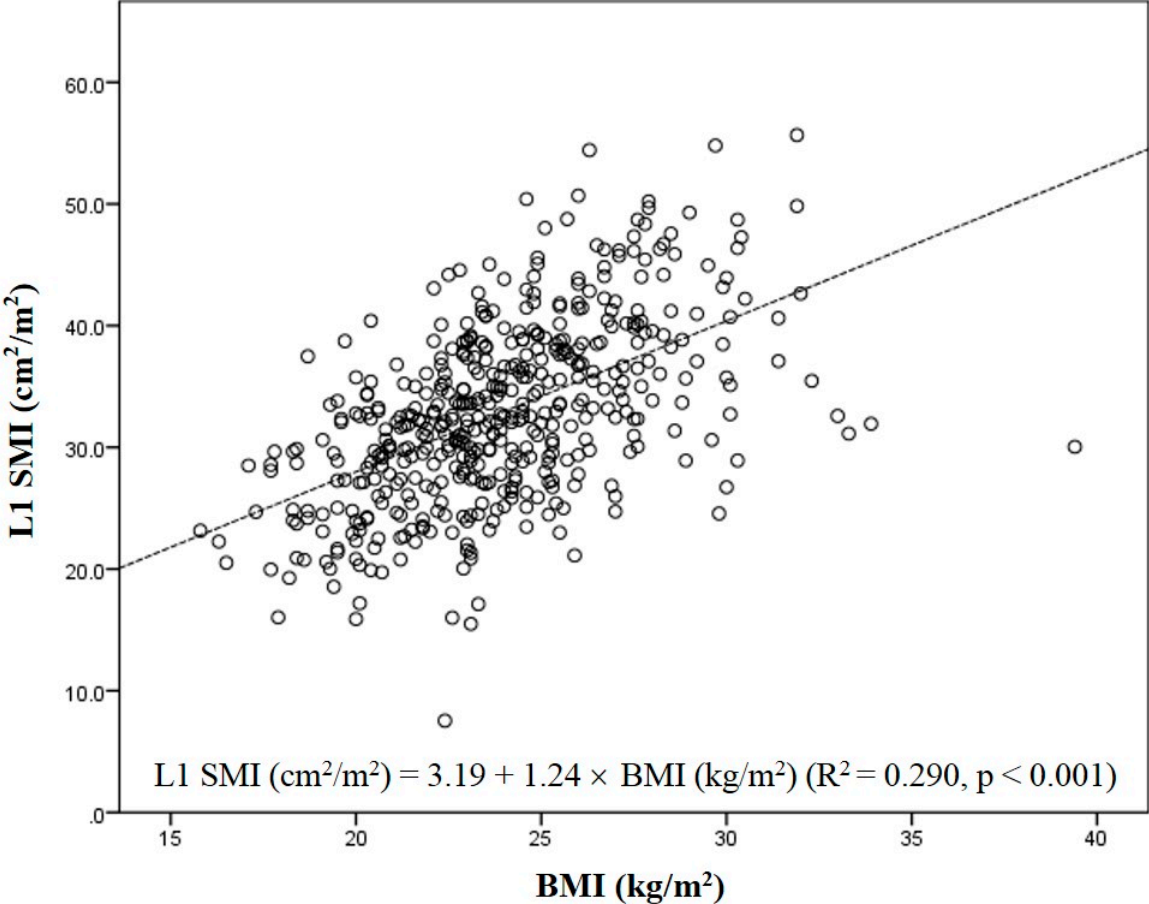

**Figure S4. Intra- and Interobserver variability of L1 SMI measurement.**

**A. Intraobserver variability of L1 SMI (observer 1)**

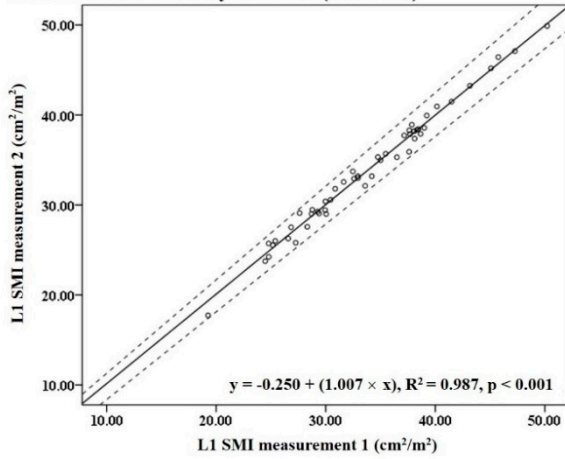

**B. Intraobserver variability of L1 SMI (observer 1)**

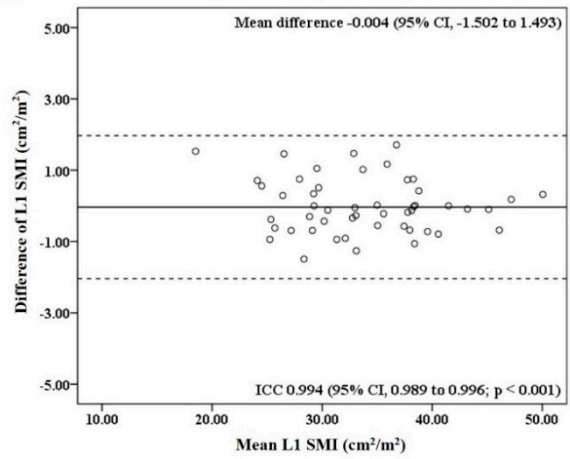

**C. Intraobserver variability of L1 SMI (observer 2)**

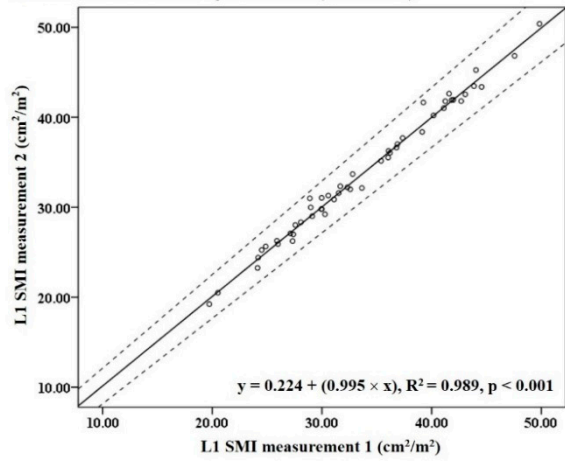

**D. Intraobserver variability of L1 SMI (observer 2)**

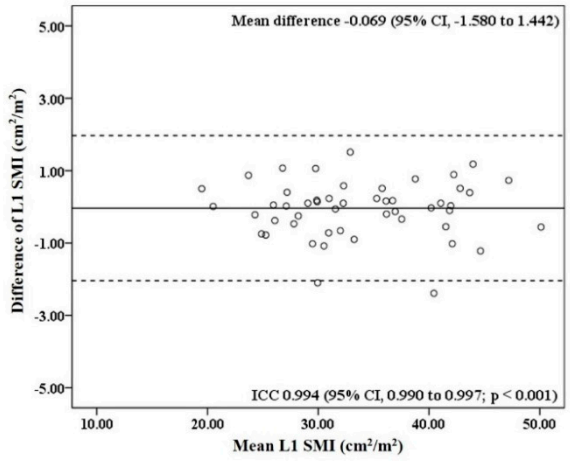

**E. Interobserver variability of L1 SMI**

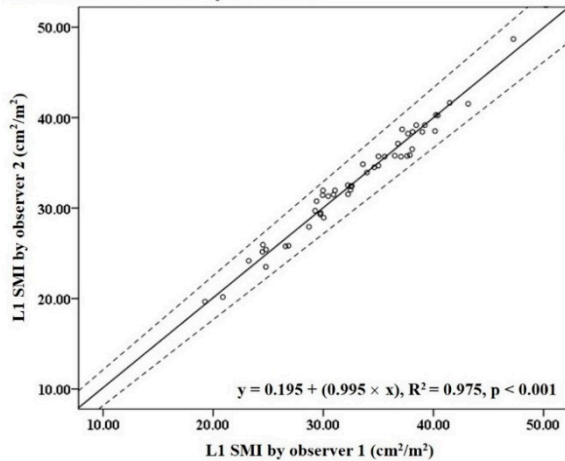

**F. Interobserver variability of L1 SMI**

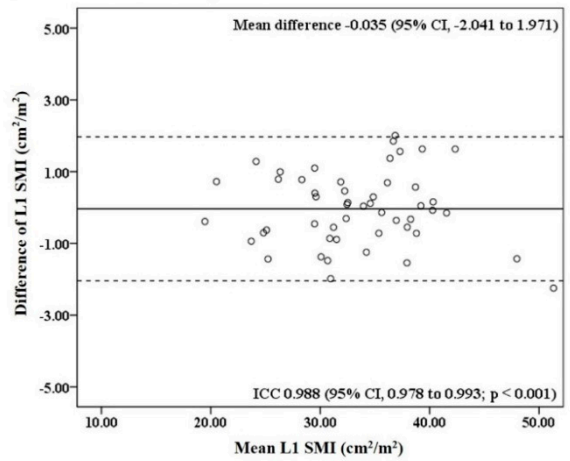

**Table S1. Detailed characteristics of performed CT scans**

|                                | Overall population   |                       |         |        | PSM population      |                      |         |        |
|--------------------------------|----------------------|-----------------------|---------|--------|---------------------|----------------------|---------|--------|
|                                | Low L1 SMI (n = 141) | High L1 SMI (n = 334) | p-value | S.diff | Low L1 SMI (n = 91) | High L1 SMI (n = 91) | p-value | S.diff |
| <b>Modality of CT scan</b>     |                      |                       |         |        |                     |                      |         |        |
| Chest CT                       | 36 (25.5)            | 68 (20.3)             | 0.043   | -0.02  | 23 (25.2)           | 23 (25.2)            | 0.72    | 0.06   |
| Coronary CT                    | 16 (11.3)            | 74 (22.1)             |         |        | 13 (14.2)           | 14 (15.3)            |         |        |
| Abdomen CT                     | 43 (30.4)            | 77 (23.0)             |         |        | 24 (26.3)           | 17 (18.6)            |         |        |
| Lower extremity CT angiography | 41 (29.0)            | 99 (29.6)             |         |        | 29 (31.8)           | 33 (36.2)            |         |        |
| Torso PET-CT                   | 5 (3.5)              | 16 (4.7)              |         |        | 2 (2.1)             | 4 (4.3)              |         |        |
| <b>Purpose of CT scan</b>      |                      |                       |         |        |                     |                      |         |        |
| Elective diagnostic exam       | 70 (49.6)            | 198 (59.2)            | 0.05    | 0.22   | 44 (48.3)           | 42 (46.1)            | 0.77    | -0.05  |
| Emergency examination          | 71 (50.3)            | 136 (40.7)            |         |        | 47 (51.6)           | 49 (53.8)            |         |        |

Data are expressed as n (%). CT = computed tomography; L1 = first lumbar vertebra; PET = positron emission tomography; PSM = propensity score-matched; S.diff = standardized difference; SMI = skeletal muscle index

**Table S2. Specific cause of non-cardiovascular death**

|                                   | Low L1 SMI<br>(n = 141) | High L1 SMI<br>(n = 334) |
|-----------------------------------|-------------------------|--------------------------|
| Overall non-cardiovascular deaths | 21 (100.0)              | 12 (100.0)               |
| Infection                         | 11 (52.3)               | 5 (41.6)                 |
| Fatal bleeding*                   | 5 (23.8)                | 3 (25.0)                 |
| Respiratory disease               | 3 (14.2)                | 2 (16.6)                 |
| Renal failure                     | 1 (4.7)                 | 0 (0.0)                  |
| Others                            | 1 (4.7)                 | 2 (16.6)                 |

Data are expressed as n (%). \*Fatal bleeding included deaths from intracranial hemorrhage and gastrointestinal bleeding. L1 = first lumbar vertebral; SMI = skeletal muscle index

**Table S3. Complete dataset of univariate analysis and stepwise multivariate analysis for 3-year clinical outcomes**

**A. Univariate analysis**

|                                                | Original population        |         |                  |         |
|------------------------------------------------|----------------------------|---------|------------------|---------|
|                                                | 3-year all-cause mortality |         | 3-year MACE      |         |
|                                                | HR (95% CI)                | p-value | HR (95% CI)      | p-value |
| Low L1 SMI                                     | 4.34 (2.45-7.69)           | <0.001  | 3.82 (2.54-5.74) | <0.001  |
| Sex (male)                                     | 0.70 (0.39-1.23)           | 0.21    | 0.79 (0.51-1.20) | 0.26    |
| Age >65 years                                  | 5.95 (2.53-13.96)          | <0.001  | 2.13 (1.36-3.32) | 0.001   |
| BMI (per 1.0 kg/m <sup>2</sup> increase)       | 0.91 (0.83-0.99)           | 0.048   | 0.85 (0.89-1.02) | 0.15    |
| LVEF <50%                                      | 1.95 (1.10-3.48)           | 0.023   | 1.78 (1.16-2.74) | 0.008   |
| CrCl <60 mL/min                                | 3.57 (2.02-6.29)           | <0.001  | 2.82 (1.89-4.22) | <0.001  |
| Total cholesterol >5.17 mmol/L (>200 mg/dL)    | 0.33 (0.12-0.92)           | 0.034   | 0.59 (0.33-1.06) | 0.08    |
| Clopidogrel at discharge                       | 0.12 (0.07-0.20)           | <0.001  | 0.27 (0.17-0.42) | <0.001  |
| Statins at discharge                           | 0.14 (0.08-0.24)           | <0.001  | 0.29 (0.19-0.44) | <0.001  |
| Average stent diameter (per 1.0 mm increase)   | 1.14 (0.60-2.17)           | 0.70    | 0.70 (0.43-1.15) | 0.16    |
| Clinical presentation as myocardial infarction | 1.48 (0.83-2.62)           | 0.18    | 1.22 (0.79-1.87) | 0.37    |
| Hypertension                                   | 1.28 (0.70-2.34)           | 0.42    | 1.15 (0.75-1.76) | 0.53    |
| Diabetes                                       | 2.64 (1.47-4.73)           | 0.001   | 2.08 (1.38-3.13) | <0.001  |
| Previous malignancy                            | 1.93 (0.82-4.53)           | 0.13    | 1.31 (0.64-2.70) | 0.46    |
| Multivessel disease                            | 1.17 (0.63-2.17)           | 0.62    | 1.41 (0.92-2.17) | 0.12    |
| Second generation DES                          | 0.75 (0.40-1.42)           | 0.38    | 0.62 (0.40-0.96) | 0.030   |
| Frailty (CFS $\geq$ 5)                         | 3.99 (2.28-6.98)           | <0.001  | 2.07 (1.37-3.13) | <0.001  |

BMI = body mass index; CI = confidence interval; CFS = Clinical Frailty Scale; CrCl = creatinine clearance; DES = drug eluting stents; L1 = first lumbar vertebra; LVEF = left ventricular ejection fraction; MACE = major adverse cardiovascular event; OR = odds ratio; PCI = percutaneous coronary intervention; SMI = skeletal muscle index



**B. Stepwise multivariate analysis**

|                                              | Original population        |         |                  |         |
|----------------------------------------------|----------------------------|---------|------------------|---------|
|                                              | 3-year all-cause mortality |         | 3-year MACE      |         |
|                                              | HR (95% CI)                | p-value | HR (95% CI)      | p-value |
| Model 2                                      |                            |         |                  |         |
| Low L1 SMI                                   | 3.74 (1.89-7.41)           | <0.001  | 4.51 (2.76-7.38) | <0.001  |
| Sex (male)                                   | 0.93 (0.52-1.68)           | 0.83    | 0.86 (0.55-1.35) | 0.53    |
| Age >65 years                                | 4.39 (1.81-10.6)           | 0.001   | 1.51 (0.93-2.46) | 0.09    |
| BMI (per 1.0 kg/m <sup>2</sup> increase)     | 1.03 (0.93-1.13)           | 0.52    | 1.07 (1.00-1.14) | 0.042   |
| Model 3                                      |                            |         |                  |         |
| Low L1 SMI                                   | 3.69 (1.81-7.52)           | <0.001  | 3.77 (2.27-6.27) | <0.001  |
| Sex (male)                                   | 0.80 (0.42-1.52)           | 0.50    | 0.90 (0.56-1.45) | 0.68    |
| Age >65 years                                | 3.07 (1.23-7.66)           | 0.016   | 1.21 (0.73-2.00) | 0.45    |
| BMI (per 1.0 kg/m <sup>2</sup> increase)     | 1.06 (0.96-1.17)           | 0.21    | 1.10 (1.02-1.18) | 0.007   |
| LVEF <50%                                    | 1.51 (0.81-2.80)           | 0.19    | 1.28 (0.81-2.00) | 0.28    |
| CrCl <60 mL/min                              | 1.48 (0.78-2.79)           | 0.23    | 1.75 (1.09-2.79) | 0.018   |
| Total cholesterol >5.17 mmol/L (>200 mg/dL)  | 0.39 (0.13-1.17)           | 0.10    | 0.70 (0.37-1.29) | 0.26    |
| Clopidogrel at discharge                     | 0.18 (0.09-0.36)           | <0.001  | 0.36 (0.21-0.60) | <0.001  |
| Statins at discharge                         | 0.32 (0.17-0.62)           | 0.001   | 0.47 (0.29-0.75) | 0.002   |
| Average stent diameter (per 1.0 mm increase) | 1.33 (0.68-2.59)           | 0.40    | 0.86 (0.51-1.43) | 0.57    |
| Model 4                                      |                            |         |                  |         |
| Low L1 SMI                                   | 4.07 (1.95-8.45)           | <0.001  | 3.76 (2.27-6.23) | <0.001  |
| Sex (male)                                   | 0.75 (0.39-1.45)           | 0.40    | 0.83 (0.51-1.35) | 0.48    |
| Age >65 years                                | 2.77 (1.09-7.01)           | 0.031   | 1.11 (0.66-1.86) | 0.68    |
| BMI (per 1.0 kg/m <sup>2</sup> increase)     | 1.06 (0.96-1.17)           | 0.22    | 1.09 (1.01-1.17) | 0.012   |
| LVEF <50%                                    | 1.28 (0.63-2.59)           | 0.48    | 1.17 (0.71-1.94) | 0.52    |

|                                                |                  |        |                  |        |
|------------------------------------------------|------------------|--------|------------------|--------|
| CrCl <60 mL/min                                | 1.32 (0.69-2.54) | 0.40   | 1.57 (0.97-2.52) | 0.06   |
| Total cholesterol >5.17 mmol/L (>200 mg/dL)    | 0.39 (0.13-1.18) | 0.10   | 0.70 (0.38-1.31) | 0.28   |
| Clopidogrel at discharge                       | 0.18 (0.09-0.36) | <0.001 | 0.36 (0.21-0.62) | <0.001 |
| Statins at discharge                           | 0.33 (0.17-0.66) | 0.001  | 0.50 (0.31-0.81) | 0.005  |
| Average stent diameter (per 1.0 mm increase)   | 1.36 (0.67-2.72) | 0.39   | 0.88 (0.52-1.50) | 0.66   |
| Clinical presentation as myocardial infarction | 1.43 (0.71-2.88) | 0.32   | 1.23 (0.76-2.01) | 0.39   |
| Hypertension                                   | 1.44 (0.74-2.80) | 0.28   | 1.01 (0.63-1.61) | 0.95   |
| Diabetes                                       | 1.48 (0.78-2.81) | 0.22   | 1.48 (0.95-2.31) | 0.08   |
| Previous malignancy                            | 1.50 (0.60-3.75) | 0.38   | 1.34 (0.62-2.86) | 0.45   |
| Multivessel disease                            | 0.77 (0.39-1.49) | 0.44   | 1.14 (0.72-1.81) | 0.55   |
| Second generation DES                          | 0.89 (0.46-1.72) | 0.73   | 0.70 (0.44-1.10) | 0.13   |

BMI = body mass index; CI = confidence interval; CrCl = creatinine clearance; DES = drug eluting stents; L1 = first lumbar vertebra; LVEF = left ventricular ejection fraction; MACE = major adverse cardiovascular event; OR = odds ratio; PCI = percutaneous coronary intervention; SMI = skeletal muscle index

**Table S4. Kaplan-Meier survival analysis of 3-year clinical outcomes by the presence of frailty**

|                          | Frail<br>(n=121) | Non-frail<br>(n=354) | Log-rank<br>p-value |
|--------------------------|------------------|----------------------|---------------------|
| All-cause mortality      | 28 (24.8)        | 22 (6.4)             | <0.001              |
| Cardiovascular           | 10 (9.7)         | 7 (2.0)              | 0.001               |
| Non-cardiovascular       | 18 (16.7)        | 15 (4.1)             | <0.001              |
| Non-fatal MI             | 7 (7.2)          | 10 (3.0)             | 0.10                |
| ST-elevation MI          | 2 (2.5)          | 7 (2.1)              | 0.89                |
| Non-ST-elevation MI      | 5 (4.8)          | 3 (1.0)              | 0.010               |
| Repeat revascularization | 10 (11.8)        | 36 (12.1)            | 0.89                |
| TVR                      | 9 (10.6)         | 27 (9.1)             | 0.73                |
| Non-TVR                  | 1 (1.2)          | 14 (4.8)             | 0.14                |
| MACE                     | 37 (33.4)        | 58 (17.8)            | <0.001              |

Data are expressed as n (%). MACE = major adverse cardiovascular event; MI = myocardial infarction; PSM = propensity-score matched; TVR = target vessel revascularization

**Table S5. Multivariate analysis of 3-year clinical outcomes by the presence of frailty**

|                         | 3-year all-cause mortality |         | 3-year MACE      |         |
|-------------------------|----------------------------|---------|------------------|---------|
|                         | HR (95% CI)                | p-value | HR (95% CI)      | p-value |
| Model 1*                |                            |         |                  |         |
| Frailty (CFS $\geq 5$ ) | 3.99 (2.28-6.98)           | <0.001  | 2.07 (1.37-3.13) | <0.001  |
| Model 2 <sup>†</sup>    |                            |         |                  |         |
| Frailty (CFS $\geq 5$ ) | 3.29 (1.87-5.79)           | <0.001  | 1.84 (1.21-2.81) | 0.004   |
| Model 3 <sup>‡</sup>    |                            |         |                  |         |
| Frailty (CFS $\geq 5$ ) | 2.46 (1.33-4.55)           | 0.004   | 1.37 (0.87-2.15) | 0.17    |
| Model 4 <sup>§</sup>    |                            |         |                  |         |
| Frailty (CFS $\geq 5$ ) | 2.81 (1.47-5.39)           | 0.002   | 1.29 (0.81-2.05) | 0.28    |

\* Univariate analysis; <sup>†</sup> adjusted for age, sex, and body mass index; <sup>‡</sup> further adjusted for left ventricular ejection fraction <50%, creatinine clearance <60 mL/min, Total cholesterol >5.17 mmol/L (>200 mg/dL), clopidogrel at discharge, statins at discharge, average diameter of inserted stents; <sup>§</sup> further adjusted for clinical presentation as myocardial infarction, hypertension, diabetes, previous malignancy, multivessel disease, and implantation of 2nd generation drug-eluting stents. CFS = Clinical Frailty Scale; CI = confidence interval; HR = hazard ratio; MACE = major adverse cardiovascular event

**Table S6. Baseline characteristics and procedural profiles: comparison between included and excluded population**

|                              | Study group<br>(n = 475) | Excluded group<br>(n = 313) | p-value |
|------------------------------|--------------------------|-----------------------------|---------|
| Age (years)                  | 65.9 ± 10.2              | 65.3 ± 11.0                 | 0.43    |
| Sex (male)                   | 330 (69.4)               | 221 (70.6)                  | 0.73    |
| BMI (kg/m <sup>2</sup> )     | 23.9 ± 3.2               | 24.6 ± 3.4                  | 0.004   |
| <b>Clinical presentation</b> |                          |                             |         |
| Myocardial infarction        | 143 (30.1)               | 72 (23.0)                   | 0.029   |
| Unstable angina              | 146 (30.7)               | 108 (34.5)                  | 0.27    |
| Stable angina                | 163 (34.3)               | 105 (33.5)                  | 0.82    |
| <b>Past medical history</b>  |                          |                             |         |
| Previous CAD                 | 10 (2.1)                 | 10 (3.1)                    | 0.34    |
| Hypertension                 | 308 (64.8)               | 208 (66.4)                  | 0.64    |
| Diabetes                     | 213 (44.8)               | 115 (36.7)                  | 0.024   |
| Dyslipidemia                 | 83 (17.4)                | 55 (17.5)                   | 0.97    |
| Cerebrovascular accident     | 40 (8.4)                 | 26 (8.3)                    | 0.96    |
| Peripheral artery disease    | 80 (16.8)                | 22 (7.0)                    | <0.001  |
| Previous malignancy          | 32 (6.7)                 | 22 (7.0)                    | 0.87    |
| Current smoker               | 163 (34.3)               | 87 (27.7)                   | 0.05    |
| Frailty (CFS ≥5)             | 121 (25.4)               | 59 (18.8)                   | 0.030   |
| Mild to moderate (CFS 5-6)   | 105 (22.1)               | 51 (16.2)                   |         |
| Severe (CFS 7)               | 16 (3.3)                 | 8 (2.5)                     |         |
| <b>Laboratory data</b>       |                          |                             |         |
| Total cholesterol (mmol/L)   | 4.09 (3.42-4.95)         | 4.22 (3.54-5.02)            | 0.29    |
| LDLc (mmol/L)                | 2.56 (1.89-3.32)         | 2.75 (1.97-3.39)            | 0.32    |
| hs-CRP (mg/L)                | 3.0 (1.0-11.0)           | 2.0 (0.9-7.9)               | 0.11    |
| HbA1c (%)                    | 6.52 ± 1.68              | 6.49 ± 1.27                 | 0.77    |
| CrCl (mL/min)                | 73.8 ± 31.4              | 78.2 ± 32.0                 | 0.05    |
| LVEF (%)                     | 53.1 ± 10.3              | 54.6 ± 10.0                 | 0.05    |
| <b>Post-PCI medications</b>  |                          |                             |         |
| Aspirin                      | 436 (91.7)               | 288 (92.0)                  | 0.91    |
| Clopidogrel                  | 417 (87.7)               | 271 (86.5)                  | 0.62    |
| Beta blocker                 | 229 (48.2)               | 144 (46.0)                  | 0.54    |
| Calcium channel blocker      | 150 (31.5)               | 103 (32.9)                  | 0.70    |
| ACE-inhibitors and ARBs      | 296 (62.3)               | 187 (59.7)                  | 0.47    |
| Statins                      | 382 (80.4)               | 266 (84.9)                  | 0.10    |
| <b>Procedural profiles</b>   |                          |                             |         |
| Number of treated lesions    | 1.7 ± 1.0                | 1.7 ± 1.1                   | 0.65    |
| Number of treated vessels    | 1.3 ± 0.6                | 1.3 ± 0.6                   | 0.25    |
| Treated vessels              |                          |                             |         |

|                             |             |             |       |
|-----------------------------|-------------|-------------|-------|
| Left main                   | 17 (3.5)    | 10 (3.1)    | 0.77  |
| LAD                         | 278 (58.5)  | 187 (59.7)  | 0.73  |
| LCX                         | 134 (28.2)  | 111 (35.4)  | 0.031 |
| RCA                         | 181 (38.1)  | 108 (34.5)  | 0.31  |
| Lesion type B2C             | 447 (94.1)  | 294 (93.9)  | 0.92  |
| Multivessel disease         | 117 (24.6)  | 92 (29.3)   | 0.14  |
| Number of inserted stents   | 1.68 ± 0.94 | 1.70 ± 0.99 | 0.84  |
| Average stent diameter (mm) | 2.97 ± 0.42 | 2.91 ± 0.53 | 0.07  |
| Total stent length (mm)     | 39.9 ± 26.7 | 40.0 ± 27.1 | 0.94  |
| Bare metal stents           | 10 (2.1)    | 9 (2.8)     | 0.49  |
| Drug eluting stents         | 468 (98.5)  | 300 (95.8)  | 0.019 |
| 1st generation              | 93 (19.5)   | 66 (21.0)   | 0.61  |
| 2nd generation              | 375 (78.9)  | 234 (74.7)  | 0.17  |

---

Data are expressed as n (%), mean ± standard deviation (SD) or median (interquartile range). ACE = angiotensin converting enzyme; ARB = angiotensin receptor blocker; BMI = body mass index; CAD = coronary artery disease; CFS = Clinical Frailty Scale; CrCl = creatinine clearance; hs-CRP = high sensitivity C-reactive protein; LDLc = low density lipoprotein cholesterol; LAD = left anterior descending artery; LCX = left circumflex artery; LVEF = left ventricular ejection fraction; PCI = percutaneous coronary intervention; RCA = right coronary artery

**Table S7. Kaplan-Meier survival analysis of 3-year clinical outcomes: comparison between included and excluded population**

|                          | Study group<br>(n = 475) | Excluded group<br>(n = 313) | Log-rank<br>p-value |
|--------------------------|--------------------------|-----------------------------|---------------------|
| All-cause mortality      | 50 (11.1)                | 24 (8.1)                    | 0.14                |
| Cardiovascular           | 17 (3.9)                 | 14 (4.7)                    | 0.61                |
| Non-cardiovascular       | 33 (7.0)                 | 10 (3.6)                    | 0.018               |
| Non-fatal MI             | 17 (4.0)                 | 10 (3.4)                    | 0.69                |
| ST-elevation MI          | 9 (2.1)                  | 6 (2.0)                     | 0.96                |
| Non-ST-elevation MI      | 8 (1.9)                  | 4 (1.4)                     | 0.59                |
| Repeat revascularization | 46 (12.0)                | 42 (15.0)                   | 0.19                |
| TVR                      | 36 (9.4)                 | 28 (9.9)                    | 0.69                |
| non-TVR                  | 15 (4.0)                 | 15 (5.5)                    | 0.34                |
| MACE                     | 95 (21.8)                | 64 (21.7)                   | 0.91                |

Data are expressed as incidence (%). MACE = major adverse cardiovascular event; MI = myocardial infarction; PSM = propensity-score matched; TVR = target vessel revascularization
